# Supplementary material for: Cationic doping engineering of the ZnV 2 O 4 cathode toward fast Zn 2+ storage
Source: Royal Society of Chemistry journal article supplement (doi:10.1039/d5dt02806j), 2026-01-01
Supplement: d5dt02806j1.pdf [file d5dt02806j1.pdf]

## **Cationic Doping Engineering of $\text{ZnV}_2\text{O}_4$ Cathode toward Fast $\text{Zn}^{2+}$ Storage**

Xiaoqing Liu <sup>a, b, \*</sup>, Mengmeng Bai <sup>a</sup>, Ruimiao Si <sup>a</sup>, Shun Zhou <sup>a</sup>, Chuang Yu <sup>c</sup>, Jinjiang Wu <sup>a, \*</sup>,

Longlong Dong <sup>d</sup>, Youzhi Liu <sup>a, b, \*</sup>

<sup>a</sup> School of Chemistry and Chemical Engineering, North University of China; Taiyuan 030051, China,

E-mail: sa175010@mail.ustc.edu.cn

<sup>b</sup> Shanxi Province Key Laboratory of Chemical Process Intensification, North University of China,

Taiyuan 030051, China, E-mail: 20220194@nuc.edu.cn, liuyz@nuc.edu.cn

<sup>c</sup> School of Information Mechanics and Sensing Engineering, Xidian University, Xi' an, Shaanxi 710126, China

<sup>d</sup> Inner Mongolia Research Institute of Synthetic Chemical Industry, Hohhot, 010010, China

| No. | Details                                                                                                                                                                                                                                                                                                           | Page No. |
|-----|-------------------------------------------------------------------------------------------------------------------------------------------------------------------------------------------------------------------------------------------------------------------------------------------------------------------|----------|
| 1   | <b>Experimental Section</b>                                                                                                                                                                                                                                                                                       | S-3~4    |
| 2   | <b>Figure S1.</b> (a-b) SEM images for $\text{ZnV}_2\text{O}_4$ sample.                                                                                                                                                                                                                                           | S-5      |
| 3   | <b>Figure S2.</b> TEM image of ZVO sample.                                                                                                                                                                                                                                                                        | S-6      |
| 4   | <b>Figure S3.</b> SEM Mapping of Al-ZVO sample.                                                                                                                                                                                                                                                                   | S-7      |
| 5   | <b>Table S1.</b> Charge transfer resistance for Al-ZVO and ZVO samples.                                                                                                                                                                                                                                           | S-8      |
| 6   | <b>Figure S4.</b> CV curves of ZVO cathode.                                                                                                                                                                                                                                                                       | S-9      |
| 7   | <b>Figure S5.</b> The electrochemical kinetics of ZVO cathode: (a) CV curves at 0.1, 0.2, 0.6 and 1.0 $\text{mV s}^{-1}$ , (b) $\log(\text{scan rate}) \sim \log(i)$ , (c) bar chart of capacitive and diffusion contributions, (d) capacitive (purple) and diffusion (blue) contributions at 1.0 $\text{mV/s}$ . | S-10     |
| 8   | <b>Table S2.</b> Comparison of electrochemical performance of Al- $\text{ZnV}_2\text{O}_4$ cathode with other spinel oxides.                                                                                                                                                                                      | S-11     |
| 9   | <b>Figure S6.</b> $D_{\text{Zn}}$ for ZVO and Al-ZVO samples.                                                                                                                                                                                                                                                     | S-12     |

## Experimental Section

### Chemical

Vanadium oxide ( $V_2O_5$ , 99.5%) was acquired from 3A, zinc acetate ( $Zn(CH_3COO)_2 \cdot 2H_2O$ , 99%), hydrazine hydrate ( $N_2H_4$ , 99%), and aluminium acetate ( $Al(CH_3COO)_3 \cdot 9H_2O$ , AR) were bought from Sinopharm Chemical Reagent Corp.

### Synthesis of Al doped $ZnV_2O_4$ sample

1 mmol  $Zn(CH_3COO)_2 \cdot 2H_2O$  and 1 mmol  $V_2O_5$  were dispersed into 30 mL deionized water. Next, 1 mL  $N_2H_4$  was added and stirred for 1 h. Subsequently, 0.04 mmol  $Al(CH_3COO)_3 \cdot 9H_2O$  was introduced, followed by stirring for 30 min. The mixture was sealed in a 50 mL autoclave, heated to 180 °C and maintained for 15 h. The resulting products were then thoroughly washed with deionized water and ethanol (three times each), followed by drying at 60 °C overnight. The resulting material was designated as Al-ZVO.

### Synthesis of $ZnV_2O_4$ sample

$ZnV_2O_4$  was synthesized similarly to Al-ZVO, but without the addition of  $Al(CH_3COO)_3 \cdot 9H_2O$ . The resulting sample was designated as ZVO.

### Characterization

Sample morphology was observed by scanning electron microscopy (SEM, TESCAN MIRA LMS, Czech Republic). The microstructure of Al-ZVO was examined using transmission electron microscopy (TEM, JEOL JEM-F200). The structure was analyzed by powder X-ray diffraction (XRD, Dandong Haoyuan-DX-2700BH). Surface chemical valence was determined by X-ray photoelectron spectroscopy (XPS, Thermo Scientific ESCALAB 250Xi).

### Electrochemical measurements

An electrode slurry comprising Al-ZVO, super P, and polyvinylidene fluoride (PVDF) in a weight ratio of 7:2:1. The slurry was coated onto 14 mm diameter stainless steel substrates. CR2025 coin cells were assembled using the coated electrodes as the cathode, zinc foil (thickness of 0.07 mm) and Whatman GF/D was used as counter electrode and separator, respectively. The 3M  $Zn(CF_3SO_3)_2$  aqueous solution is used as electrolyte with a volume of 50  $\mu$ L for battery assembly. The loading of test electrodes is 1.4 ~ 2.5 mg  $cm^{-2}$ . The average thickness of the electrode is 20  $\mu$ m. Electrochemical performance was evaluated using a Neware Battery Test System.

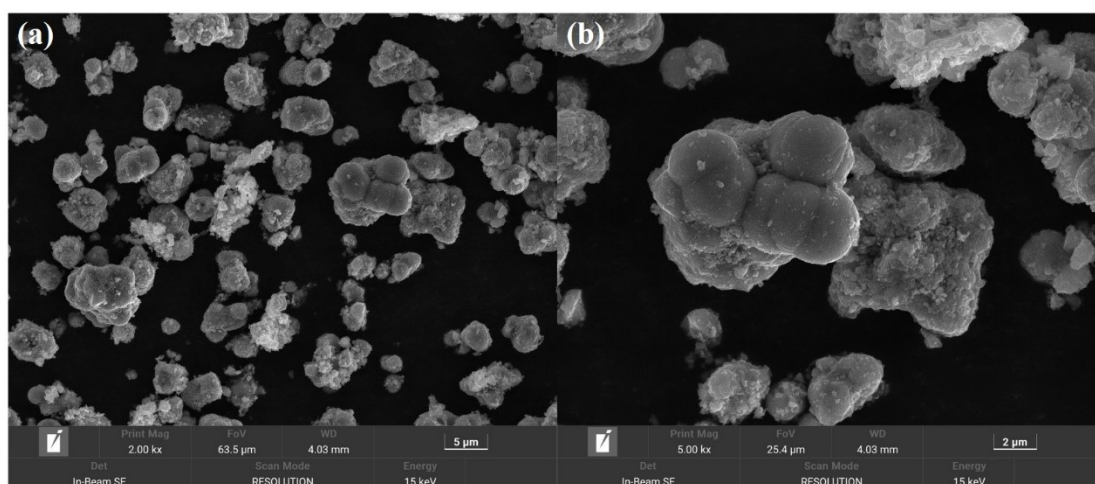

**Figure S1.** (a-b) SEM images for  $\text{ZnV}_2\text{O}_4$  sample.

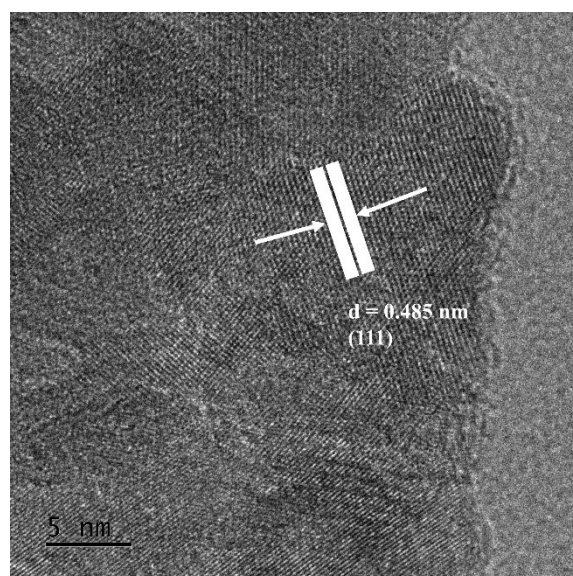

**Figure S2.** TEM images of ZVO sample.

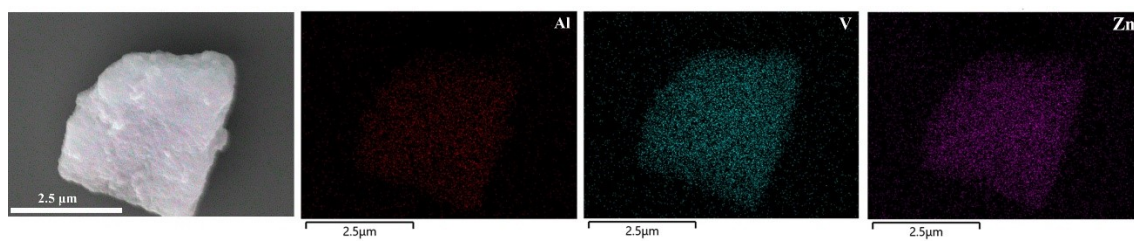

**Figure S3.** SEM Mapping of Al-ZVO sample.

**Table S1.** Charge transfer resistance for Al-ZVO and ZVO samples.

| Sample            | Al-ZVO | ZVO | Error (%) |
|-------------------|--------|-----|-----------|
| $R_s (\Omega)$    | 0.76   | 1.9 | 0.9       |
| $R_{ct} (\Omega)$ | 85     | 110 | 1.5       |

The equivalent circuit model shown in Figure 3f was selected to physically represent the electrochemical interfaces and processes in our system. It comprises  $R_s$  to describe ohmic resistance originated from contact resistance of components in the high frequency range, and  $R_{ct}$  to model the charge transfer resistance in the mid-frequency range as well as  $W_1$  related to the  $Zn^{2+}$  diffusion in the electrode within low-frequency range. This model is well-established for intercalation-type cathode materials systems and provided an excellent fit to the experimental data across the entire frequency range.

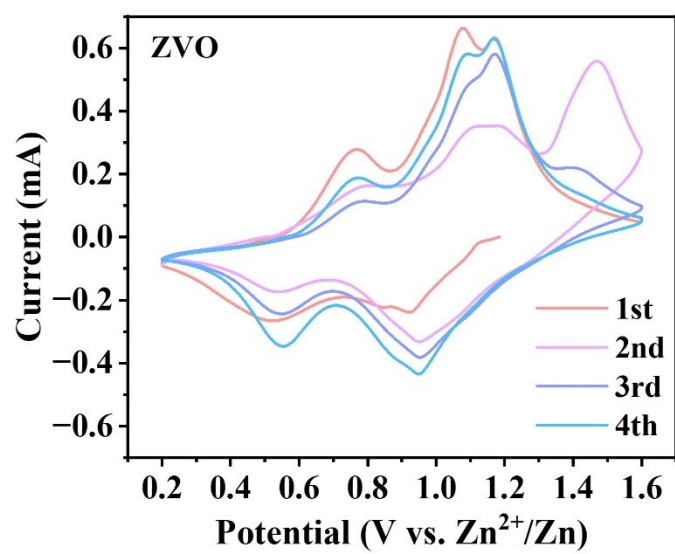

Figure S4. CV curves of ZVO cathode.



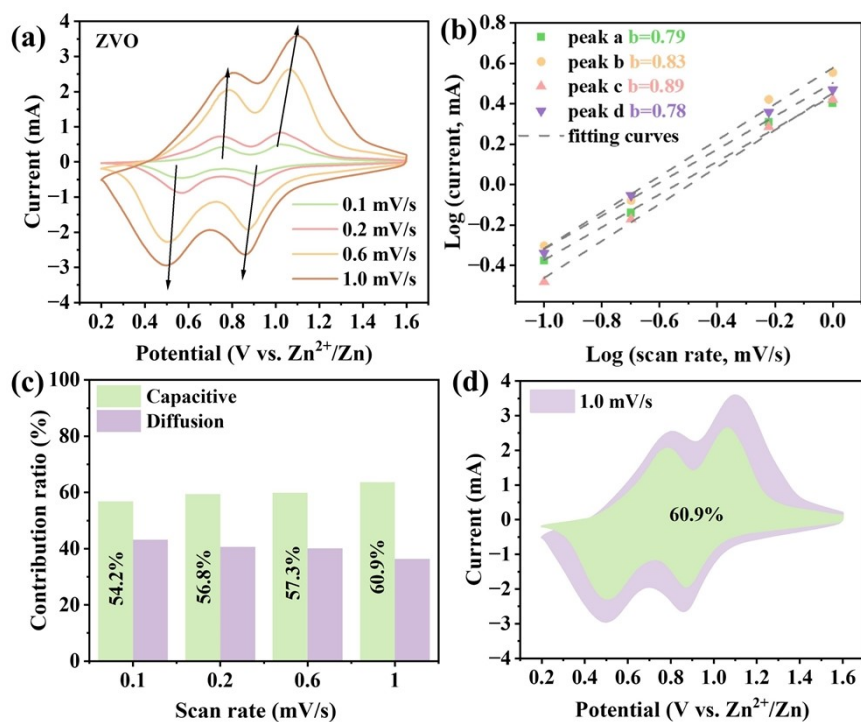

**Figure S5.** The electrochemical kinetics of ZVO cathode: (a) CV curves at 0.1, 0.2, 0.6 and 1.0  $\text{mV s}^{-1}$ , (b)  $\log(\text{scan rate}) \sim \log(i)$ , (c) bar chart of capacitive and diffusion contributions, (d) capacitive (green) and diffusion (purple) contributions at 1.0  $\text{mV/s}$ .

**Table S2.** Comparison of electrochemical performance of Al-ZnV<sub>2</sub>O<sub>4</sub> cathode with other spinel oxides.

| Sample                                                 | Cycling performance                                                  | Rate capability                                   | References       |
|--------------------------------------------------------|----------------------------------------------------------------------|---------------------------------------------------|------------------|
| ZMn <sub>2</sub> O <sub>4</sub> /C                     | 80 mA h g <sup>-1</sup> after 500 cycles at 0.5 A g <sup>-1</sup>    | -                                                 | [1]              |
| MgV <sub>2</sub> O <sub>4</sub>                        | 128.9 mA h g <sup>-1</sup> after 500 cycles at 4.0 A g <sup>-1</sup> | 176 mA h g <sup>-1</sup> at 5 A g <sup>-1</sup>   | [2]              |
| ZnV <sub>2</sub> O <sub>4</sub>                        | 206 mAh g <sup>-1</sup> over 1000 cycles at a 10 C                   | 174 mA h g <sup>-1</sup> at 20 C                  | [3]              |
| Ni-ZnMn <sub>2</sub> O <sub>4</sub>                    | 181 mA h g <sup>-1</sup> after 100 cycles at 0.2 A g <sup>-1</sup>   | 84 mA h g <sup>-1</sup> at 2 A g <sup>-1</sup>    | [4]              |
| MXene/ZnMn <sub>2</sub> O <sub>4</sub>                 | 58 mA h g <sup>-1</sup> after 2000 cycles at 1 A g <sup>-1</sup>     | 84 mA h g <sup>-1</sup> at 4 A g <sup>-1</sup>    | [5]              |
| Ni/Co-ZnMn <sub>2</sub> O <sub>4</sub> @N-rGO          | 95.4 mA h g <sup>-1</sup> after 900 cycles at 1 A g <sup>-1</sup>    | 94 mA h g <sup>-1</sup> at 1.5 A g <sup>-1</sup>  | [6]              |
| Mg <sub>2</sub> VO <sub>4</sub>                        | 74 mA h g <sup>-1</sup> after 1000 cycles at 1 A g <sup>-1</sup>     | 125 mA h g <sup>-1</sup> at 2 A g <sup>-1</sup>   | [7]              |
| ZnMn <sub>2</sub> O <sub>4</sub> ·0.94H <sub>2</sub> O | 77 mA h g <sup>-1</sup> after 2000 cycles at 4 A g <sup>-1</sup>     | 28 mA h g <sup>-1</sup> at 8 A g <sup>-1</sup>    | [8]              |
| MnCo <sub>2</sub> O <sub>4</sub>                       | 81 mA h g <sup>-1</sup> after 250 cycles at 0.2 A g <sup>-1</sup>    | 175 mA h g <sup>-1</sup> at 1 A g <sup>-1</sup>   | [9]              |
| Mn <sub>3</sub> O <sub>4</sub>                         | 245 mA h g <sup>-1</sup> after 500 cycles at 0.5 A g <sup>-1</sup>   | 126 mA h g <sup>-1</sup> at 1.5 A g <sup>-1</sup> | [10]             |
| Al-ZnV <sub>2</sub> O <sub>4</sub>                     | 147 mA h g <sup>-1</sup> after 940 cycles at 5 A g <sup>-1</sup>     | 91 mA h g <sup>-1</sup> at 20 A g <sup>-1</sup>   | <b>This work</b> |

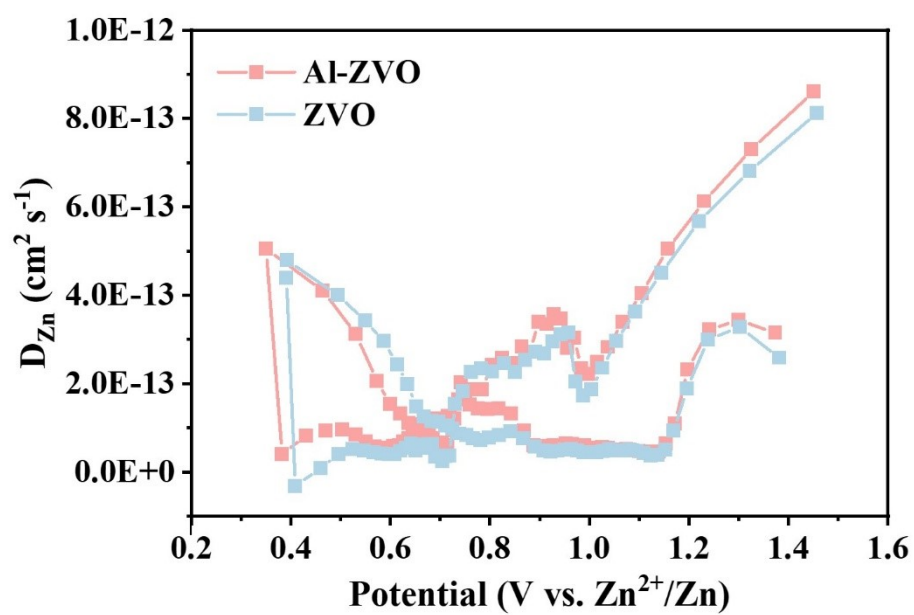

Figure S6.  $D_{Zn}$  for ZVO and Al-ZVO samples.

## References:

- [1] Ning Zhang, Fangyi Cheng, Yongchang Liu, et al., Cation-deficient spinel  $\text{ZnMn}_2\text{O}_4$  cathode in  $\text{Zn}(\text{CF}_3\text{SO}_3)_2$  electrolyte for rechargeable aqueous Zn-ion battery, *J. Am. Chem. Soc.*, 2016, 138, 12894–12901.
- [2] Wen Tang, Binxu Lan, Chen Tang, et al., Urchin-like spinel  $\text{MgV}_2\text{O}_4$  as a cathode material for aqueous zinc ion batteries, *ACS Sustainable Chem. Eng.*, 2020, 8, 3681–3688.
- [3] Yi Liu, Chang Li, Jia Xu, et al., Electro activation-induced spinel  $\text{ZnV}_2\text{O}_4$  as a high-performance cathode material for aqueous zinc-ion battery, *Nano Energy* 2020, 67, 104211.
- [4] Chuan Wang, Bo-Hao Xiao, Jiale Huang, et al., Microstructure strain of  $\text{ZnMn}_2\text{O}_4$  spinel by regulation of tetrahedral sites for high-performance aqueous zinc-ion battery, *Adv. Funct. Mater.*, 2024, 34, 2405680.
- [5] Minjie Shi, Bei Wang, Yi Shen, 3D assembly of MXene-stabilized spinel  $\text{ZnMn}_2\text{O}_4$  for highly durable aqueous zinc-ion batteries, *Chemical. Eng. Journal*, 2020, 399, 125627.
- [6] Yayuan Tao, Zhi Li, Linbin Tang, Nickel and cobalt Co-substituted spinel  $\text{ZnMn}_2\text{O}_4@\text{N-rGO}$  for increased capacity and stability as a cathode material for rechargeable aqueous zinc-ion battery, *Electrochim. Acta*, 2020, 331, 135296.
- [7] Yu Zhang, Jing Xu, Chenfan Liu, et al., Ion-exchange-induced high-performance of inverse spinel  $\text{Mg}_2\text{VO}_4$  for aqueous zinc-ion batteries, 2022, 549, 232075.
- [8] Tzu-Ho Wu and Wei-Yuan Liang, Reduced intercalation energy barrier by rich structural water in spinel  $\text{ZnMn}_2\text{O}_4$  for high-rate zinc-ion batteries, *ACS Appl. Mater. Interfaces*, 2021, 13, 20, 23822–23832.
- [9] Nishant Yadav, Sonti Khamsanga, Soorathep Kheawhom,  $\text{MnCo}_2\text{O}_4$  spinel microsphere assembled with flake structure as a cathode for high-performance zinc ion battery, *Journal of Energy Storage*, 2023, 64, 107148.
- [10] Le Jiang, Zeyi Wu, Yanan Wang, et al., Ultrafast zinc-ion diffusion ability observed in 6.0-nanometer spinel nanodots, *ACS Nano*, 2019, 13, 9, 10376–10385.
